# Supplementary material
Source: publisher figshare collection journal article supplement (https://karger.figshare.com/ndownloader/files/30610302)
Supplement: Supplementary file 1 [file 30610302]

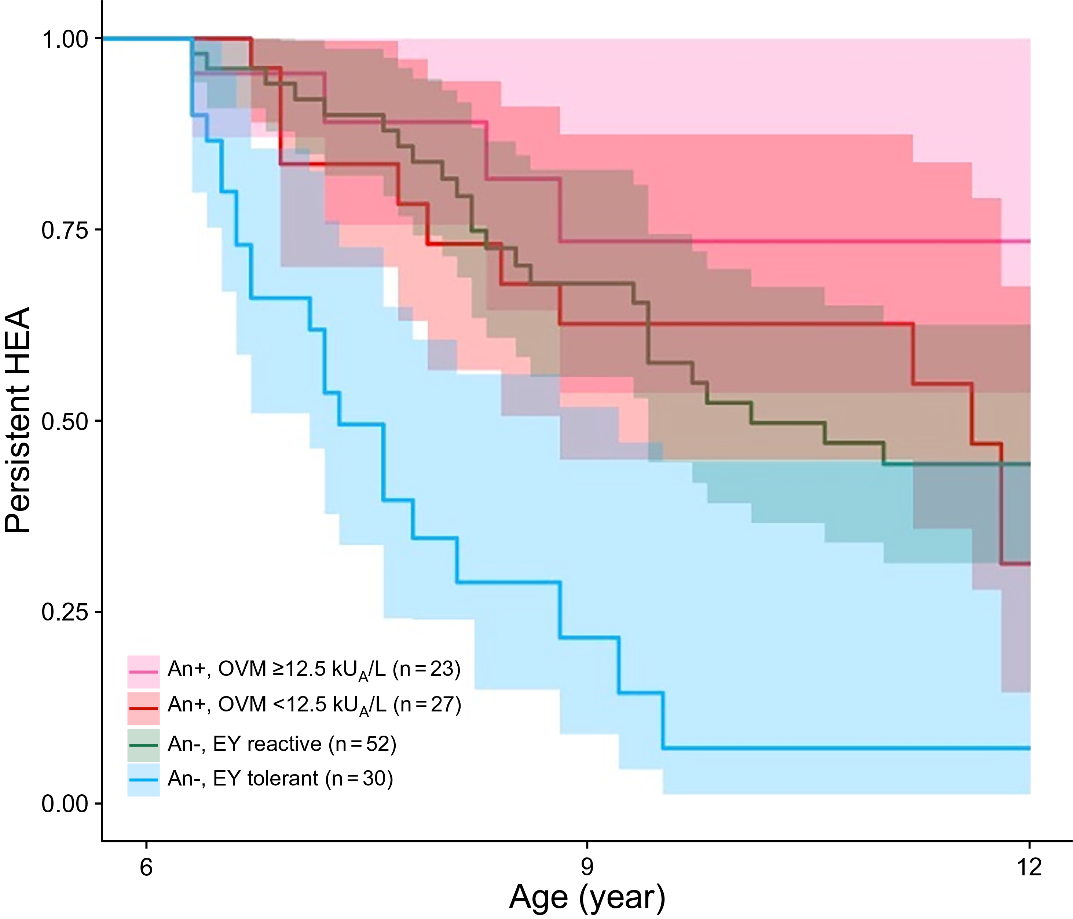


**Supplementary Fig. 3**. Kaplan-Meier estimation curve of the HEA resolution, which combined multiple factors associated with resolution.

Purple line indicates patients who had a history of anaphylaxis and whose ovomucoid-specific IgE values at 6 years of age were ≥12.5 kUA/L. Red line indicates patients who had a history of anaphylaxis to HE and whose ovomucoid-specific IgE values at 6 years of age were <12.5 kUA/L. Green line indicates patients who did not have a history of anaphylaxis to HE and who could not tolerate EY. Blue line indicates patients who did not have a history of anaphylaxis to HE and who could tolerate EY. Shaded areas indicate 95% confidence intervals. Those who were lost to follow up and those who were enrolled for OIT were designated to have dropped out. Using log-rank analysis with Bonferroni correction, significance was observed between patients who did not have a history of anaphylaxis to HE and could tolerate EY and each of the three other groups (p <0.005).

An, anaphylaxis; EY, heated egg yolk; HE, hen's egg; HEA, hen's egg allergy; OIT, oral immunotherapy; OVM, ovomucoid-specific IgE values.
